# Supplementary material for: Injectable and cross-linkable polyphosphazene hydrogels for space-filling scaffolds
Source: Royal Society of Chemistry journal article supplement (doi:10.1039/c4py00967c), 2014-09-11
Supplement: c4py00967c2.pdf [file c4py00967c2.pdf]

## Supporting Information

# Injectable and Cross-linkable Polyphosphazene Hydrogel for Space-Filling Scaffolds

*Zhangjun Huang,<sup>†</sup> Xunwei Liu,<sup>‡</sup> Shuangshuang Chen,<sup>†</sup> Qinghua Lu<sup>†,\*</sup> and Gang*

*Sun<sup>‡,\*</sup>*

*<sup>†</sup>School of Chemistry and Chemical Engineering, the State Key Laboratory of Metal*

*Matrix Composites, Shanghai Jiaotong University, Shanghai, P. R. China*

*<sup>‡</sup>Department of Medical Imaging, Jinan Military General Hospital, Jinan, Shangdong,*

*P. R. China*

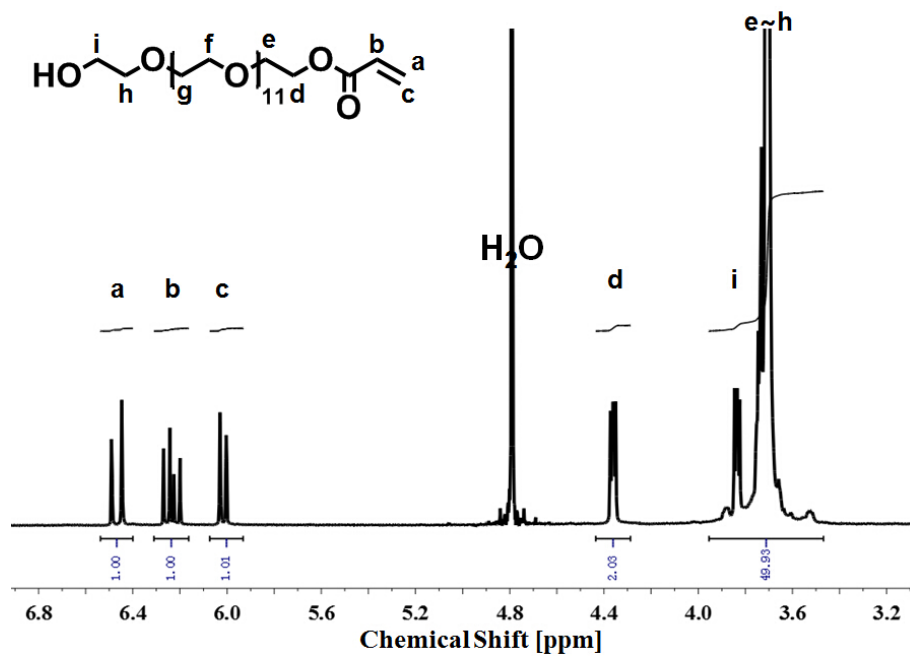

Figure S1. <sup>1</sup>H NMR spectrum of 600ac.

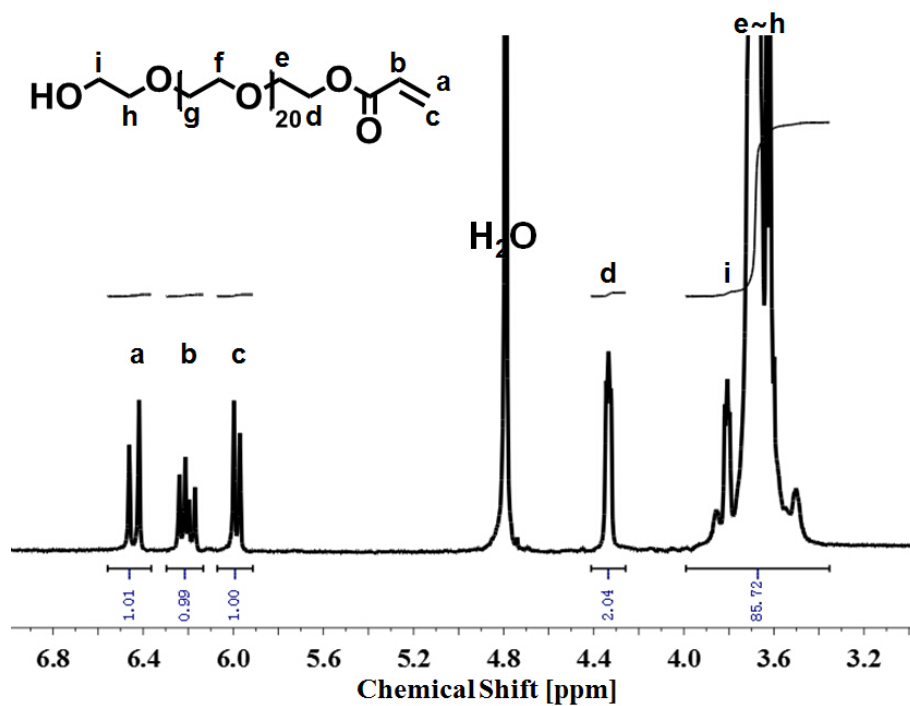

Figure S2. <sup>1</sup>H NMR spectrum of 1000ac.

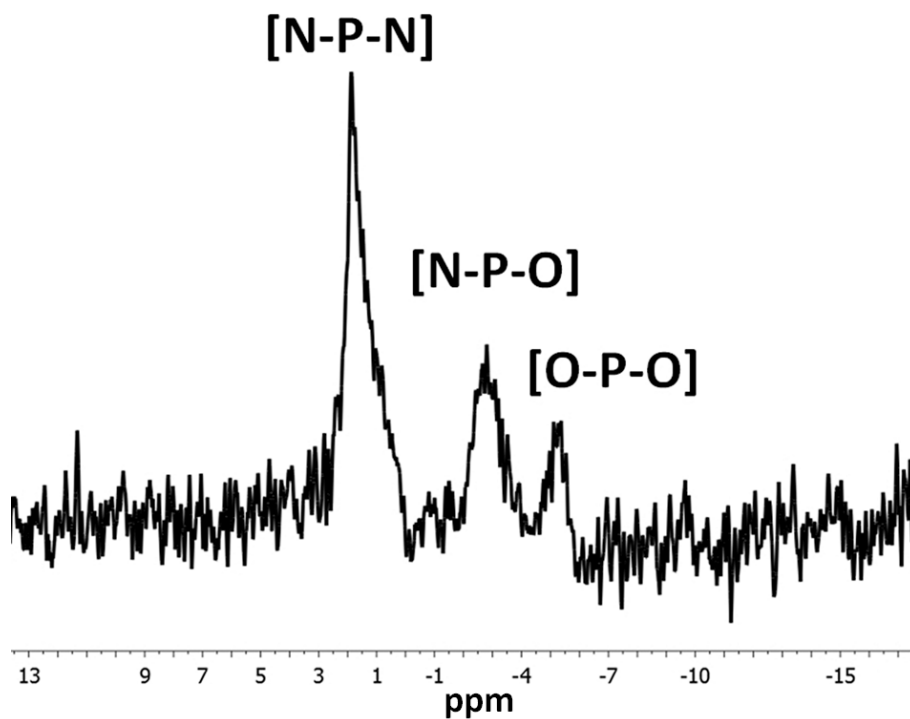

Figure S3.  $^{31}\text{P}$  NMR spectrum of P1.

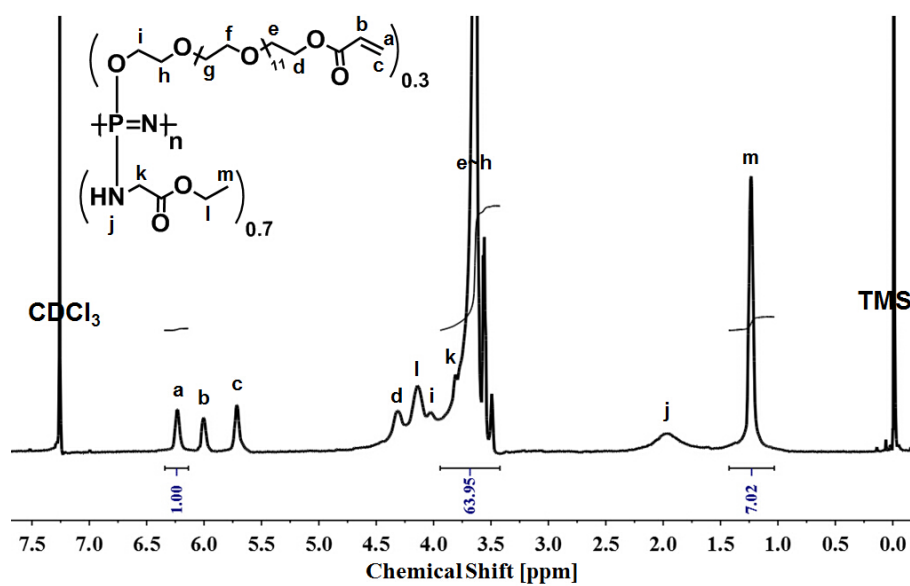

Figure S4.  $^1\text{H}$  NMR spectrum of P1.



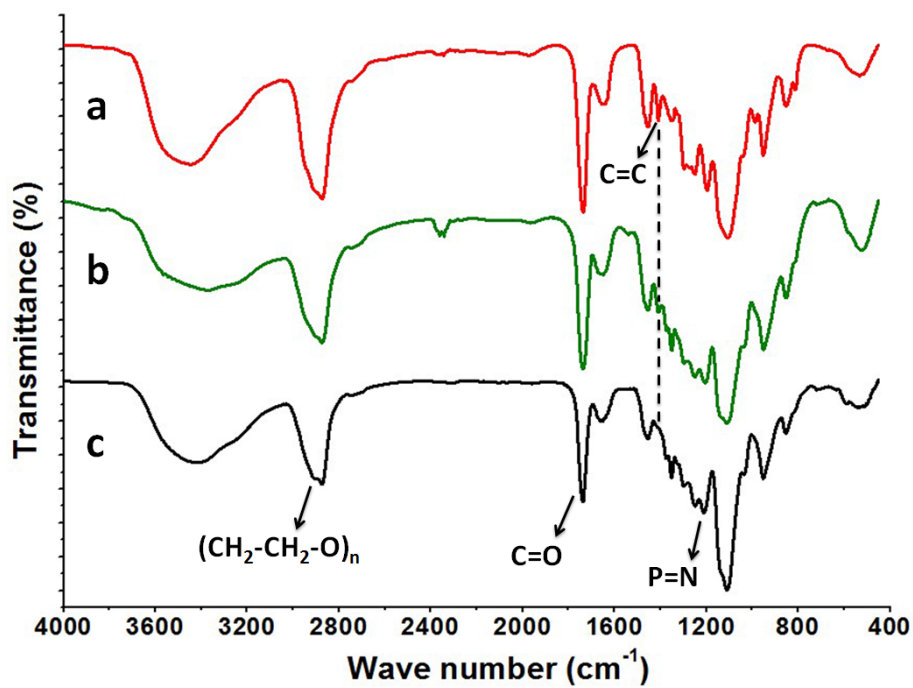

**Figure S7.** P2 irradiated for (a) 0 s, (b) 20 s, (c) 40 s.

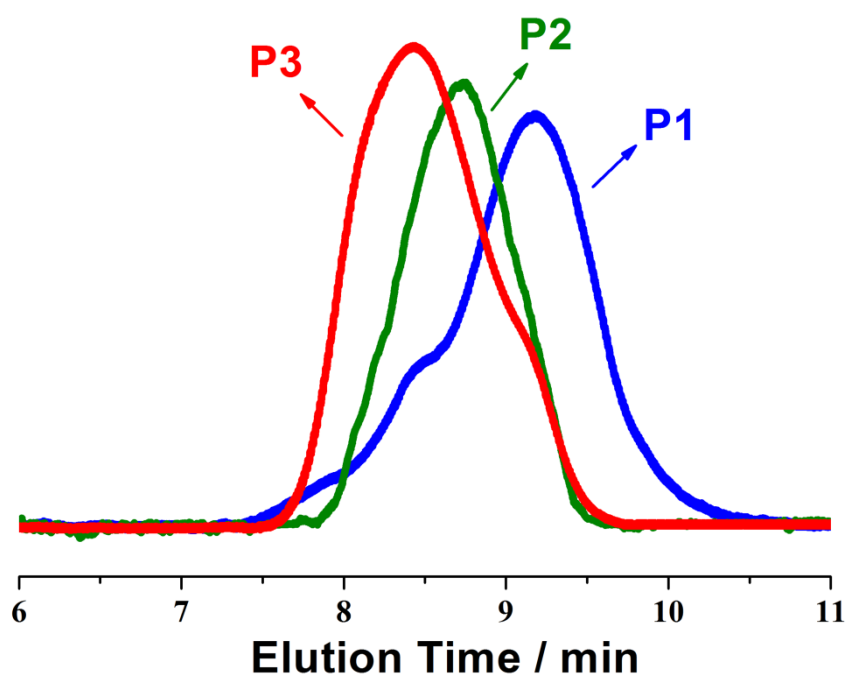

**Figure S8.** GPC measurement for mix-substituted polyphosphazenes.
